# Supplementary material for: Acupuncture Treatment for Emotional Problems in Women with Infertility: A Systematic Review and Meta-Analysis
Source: MDPI journal article supplement (doi:10.3390/healthcare11202704), 2023-10-10
Supplement: s1 [file s1]

**Supplementary Table S2.** Search strategy used in PubMed.

|     |                                                                                                                                                                                                                                                                                                                                                                                                                                                                   |
|-----|-------------------------------------------------------------------------------------------------------------------------------------------------------------------------------------------------------------------------------------------------------------------------------------------------------------------------------------------------------------------------------------------------------------------------------------------------------------------|
| #1  | Infertility [Mesh]                                                                                                                                                                                                                                                                                                                                                                                                                                                |
| #2  | infertility [tiab] OR subfertility [tiab] OR subfertile [tiab] OR oligospermia [tiab] OR azoospermia [tiab] OR obstructive azoospermia[tiab] OR genital disease[tiab]                                                                                                                                                                                                                                                                                             |
| #3  | #1 OR #2                                                                                                                                                                                                                                                                                                                                                                                                                                                          |
| #4  | Acupuncture [Mesh] OR Acupuncture Therapy [mesh]                                                                                                                                                                                                                                                                                                                                                                                                                  |
| #5  | acupuncture [tiab] OR acupressure [tiab] OR electroacupuncture [tiab] OR auricular acupuncture [tiab] OR scalp acupuncture[tiab] OR hand acupuncture[tiab] OR pharmacopuncture [tiab] OR transcutaneous electricalacupoint[tiab]                                                                                                                                                                                                                                  |
| #6  | #4 OR #5                                                                                                                                                                                                                                                                                                                                                                                                                                                          |
| #7  | Emotions [Mesh] OR Anxiety [Mesh] OR Depression[Mesh] OR Stress, Psychological [Mesh] OR Pain [Mesh] OR Fear [Mesh] OR Panic [Mesh] OR Self Efficacy [Mesh] OR Resilience, Psychological [Mesh] OR Relaxation [Mesh] OR Adaptation, Psychological [Mesh] OR Mental Disorders [Mesh]                                                                                                                                                                               |
| #8  | emotion [tiab] OR emotional [tiab] OR mood [tiab] OR feeling [tiab] OR psychological [tiab] OR personality [tiab] OR anxiety [tiab] OR anxious [tiab] OR anxiousness [tiab] OR depression [tiab] OR depressive [tiab] OR stress [tiab] OR distress [tiab] OR distressing [tiab] OR pain [tiab] OR painful [tiab] OR fear [tiab] OR panic [tiab] OR nervousness [tiab] OR self-efficacy [tiab] OR relaxation [tiab] OR adaptation [tiab] OR mental disorder [tiab] |
| #9  | #7 OR #8                                                                                                                                                                                                                                                                                                                                                                                                                                                          |
| #10 | Randomized Controlled Trial[Mesh] OR Controlled Clinical Trial [Mesh]                                                                                                                                                                                                                                                                                                                                                                                             |
| #11 | randomized controlled trial [tiab] OR randomized clinical trial [tiab] OR randomized [tiab] OR randomly [tiab] OR trial [tiab]                                                                                                                                                                                                                                                                                                                                    |
| #12 | #10 OR #11                                                                                                                                                                                                                                                                                                                                                                                                                                                        |
| #13 | #3 AND #6 AND #9 AND #12                                                                                                                                                                                                                                                                                                                                                                                                                                          |
